# Supplementary material for: Genomic characterization of early-stage esophageal squamous cell carcinoma in a Japanese population
Source: PubMed Central journal article supplement (PMC6609253; doi:10.18632/oncotarget.27014), 2019-06-25
Supplement: oncotarget-10-4139-s001.pdf [file oncotarget-10-4139-s001.pdf]

## Genomic characterization of early-stage esophageal squamous cell carcinoma in a Japanese population

### SUPPLEMENTARY MATERIALS

**Supplementary Table 1: Sample characteristics of 42 superficial esophageal squamous cell neoplasm patients**

| ESCN <sup>a</sup> (HGIN/T1a/T1b)                 | 6/24/12            |
|--------------------------------------------------|--------------------|
| Gender (Male/Female)                             | 39/3               |
| Age                                              | 68.4 ± 7.0 (53–83) |
| Drinking History (none/light/heavy) <sup>b</sup> | 1/16/25            |
| smoking (none/light/heavy) <sup>c</sup>          | 3/21/18            |
| rs671 at ALDH2 (GA/GG+AA)                        | 29/13              |
| rs1229984 at ADH1B (GG/GA+AA)                    | 5/37               |

<sup>b</sup>Heavy alcohol drinker was defined as alcohol consumption of more than 60 g/day based on the ethanol conversion data.

<sup>c</sup>Heavy smoker was defined as tobacco consumption more than the Brickman index 1000.

<sup>a</sup>ESCN; Esophageal squamous cell neoplasm.

**Supplementary Table 2: Average read depth for exome sequencing in 16 ESCC samples**

| ID    | Average Coverage |       |
|-------|------------------|-------|
|       | Tumor            | Blood |
| 26723 | 186.6            | 105.4 |
| 11515 | 139.6            | 101.7 |
| 22780 | 127.5            | 107   |
| 23727 | 74.2             | 75.4  |
| 25178 | 142              | 128.8 |
| 25287 | 118.5            | 131.8 |
| 11489 | 166.4            | 122.4 |
| 22739 | 159.3            | 68.8  |
| 23658 | 132              | 110.2 |
| 24311 | 140.4            | 87.5  |
| 24411 | 150.1            | 84.7  |
| 25074 | 144.7            | 85.2  |
| 25243 | 141.4            | 58.9  |
| 22833 | 120.7            | 91.8  |
| 26694 | 187.6            | 123.4 |
| 25089 | 164.1            | 143   |

Average read Depth for exome sequencing in 16 esophageal squamous cell carcinoma and matched blood leukemia samples. Results were analyzed using exome sequencing.

**Supplementary Table 3: The frequencies covered by more than 10 sequences in screening stage samples**

| ID    | The frequency of target bases covered were > 10 (%) |       |
|-------|-----------------------------------------------------|-------|
|       | Tumor                                               | Blood |
| 26723 | 98.39                                               | 99.1  |
| 11515 | 98.88                                               | 98.51 |
| 22780 | 98.78                                               | 98.52 |
| 23727 | 84.74                                               | 97.61 |
| 25178 | 98.84                                               | 98.74 |
| 25287 | 98.65                                               | 98.78 |
| 11489 | 98.99                                               | 98.77 |
| 22739 | 98.95                                               | 97.03 |
| 23658 | 98.7                                                | 98.58 |
| 24311 | 98.87                                               | 98.03 |
| 24411 | 98.85                                               | 97.92 |
| 25074 | 98.78                                               | 98.16 |
| 25243 | 98.82                                               | 81.75 |
| 22833 | 98.61                                               | 98.23 |
| 26694 | 99.04                                               | 98.52 |
| 25089 | 98.71                                               | 98.99 |

Target bases were covered by more than 10 sequences during exome sequencing of 16 esophageal squamous cell carcinoma and matched blood leukemia samples. Results were analyzed by exome sequencing.

**Supplementary Table 4: Somatic mutations in 16 early-stage Esophageal neoplasms using exome sequencing. See Supplementary\_Table\_4**

**Supplementary Table 5: Target panel mounted 128 genes used in the replication stage**

|                 |                |                |                |                |               |
|-----------------|----------------|----------------|----------------|----------------|---------------|
| <i>AJUBA</i>    | <i>FAT2</i>    | <i>KRAS</i>    | <i>NOTHC3</i>  | <i>SLC6A6</i>  | <i>ZNF323</i> |
| <i>BAP1</i>     | <i>FAT3</i>    | <i>LAMB1</i>   | <i>NUTM2G</i>  | <i>SLITRK3</i> | <i>ZNF496</i> |
| <i>BMPR1B</i>   | <i>FAT4</i>    | <i>LIMCH1</i>  | <i>OBSCN</i>   | <i>SOX1</i>    | <i>ZNF750</i> |
| <i>C17orf28</i> | <i>FBLN2</i>   | <i>LRP1B</i>   | <i>OR2T3</i>   | <i>SOX2</i>    |               |
| <i>CABS1</i>    | <i>FBRS</i>    | <i>LRP5</i>    | <i>PALB2</i>   | <i>STAG2</i>   |               |
| <i>CCND1</i>    | <i>FLG</i>     | <i>LRPAP1</i>  | <i>PCDH8</i>   | <i>SYBU</i>    |               |
| <i>CDH23</i>    | <i>FOXA1</i>   | <i>LYST</i>    | <i>PCDHA1</i>  | <i>TDRD1</i>   |               |
| <i>CDKN2B</i>   | <i>FOXC2</i>   | <i>MAGEE1</i>  | <i>PCDHA13</i> | <i>TERT</i>    |               |
| <i>CES1</i>     | <i>FRYL</i>    | <i>MET</i>     | <i>PCDHA3</i>  | <i>TET1</i>    |               |
| <i>COL6A6</i>   | <i>FSCB</i>    | <i>MGA</i>     | <i>PCLO</i>    | <i>TET2</i>    |               |
| <i>CREBBP</i>   | <i>GPR98</i>   | <i>MIA3</i>    | <i>PIK3CA</i>  | <i>TGFBR2</i>  |               |
| <i>CSMD1</i>    | <i>GTPBP8</i>  | <i>MLL1</i>    | <i>PKHD1L1</i> | <i>THSD7B</i>  |               |
| <i>CSMD3</i>    | <i>HBG2</i>    | <i>MLL2</i>    | <i>PRDM9</i>   | <i>TLR1</i>    |               |
| <i>CUL9</i>     | <i>HERC6</i>   | <i>MSTO1</i>   | <i>PRSS21</i>  | <i>TP53</i>    |               |
| <i>DCSTAMP</i>  | <i>HKR1</i>    | <i>MTERFD1</i> | <i>PTEN</i>    | <i>TTN</i>     |               |
| <i>DHX9</i>     | <i>HPSE</i>    | <i>MUC16</i>   | <i>PTPN13</i>  | <i>UBR2</i>    |               |
| <i>DNAH14</i>   | <i>HUWE1</i>   | <i>MUC19</i>   | <i>PTPRD</i>   | <i>ULK4</i>    |               |
| <i>DNAH3</i>    | <i>HYDIN</i>   | <i>MYO18A</i>  | <i>RAG1</i>    | <i>UNC13C</i>  |               |
| <i>DST</i>      | <i>INTU</i>    | <i>NBEA</i>    | <i>RB</i>      | <i>VPS35</i>   |               |
| <i>EGFR</i>     | <i>IQCB1</i>   | <i>NCKAP5</i>  | <i>RELN</i>    | <i>WAPAL</i>   |               |
| <i>EP300</i>    | <i>IQSEC1</i>  | <i>NCOR1</i>   | <i>RFX6</i>    | <i>WNK2</i>    |               |
| <i>ERBB2</i>    | <i>ITGA10</i>  | <i>NFE2L2</i>  | <i>SACS</i>    | <i>YAP1</i>    |               |
| <i>F5</i>       | <i>KDM6A</i>   | <i>NLRP14</i>  | <i>SDAD1</i>   | <i>ZAN</i>     |               |
| <i>FAM135B</i>  | <i>KIR3DL1</i> | <i>NOTCH1</i>  | <i>SIDT1</i>   | <i>ZCCHC2</i>  |               |
| <i>FAT1</i>     | <i>KLF5</i>    | <i>NOTCH2</i>  | <i>SLC35E1</i> | <i>ZFHX4</i>   |               |

Target panel-mounted 128 genes used in the replication stage. These 128 genes included 89 genes that had non-synonymous somatic mutations and copy-number alterations in at least two patients, and 39 genes were associated with the development of Japanese esophageal squamous cell carcinoma.

**Supplementary Table 6: Somatic mutations in 26 cancerous tissues in early-stage Esophageal squamous cell carcinoma using target sequencing. See Supplementary\_Table\_6**

**Supplementary Table 7: Somatic mutations in 26 non-cancerous tissues in early-stage esophageal squamous cell carcinoma using target sequencing**

| Sample ID | Gene    | Type      | Zygoty | Chr. | Position  | Ref         | Alt            | MAF   | Count | Coverage | Codon    | AA       | AA      |
|-----------|---------|-----------|--------|------|-----------|-------------|----------------|-------|-------|----------|----------|----------|---------|
| 8372      | NOTCH2  | SNP       | HET    | 1    | 120478094 | C           | A              | 0.308 | 20    | 65       | MISSENSE | gGt/gTt  | G1219V  |
| 8372      | TTN     | SNP       | HOM    | 2    | 179449478 | G           | T              | 0.205 | 9     | 44       | NONSENSE | taC/taA  | Y12565* |
| 8372      | FAM135B | SNP       | HOM    | 8    | 139164848 | G           | C              | 0.131 | 49    | 374      | MISSENSE | Caa/Gaa  | Q624E   |
| 8372      | NOTCH1  | SNP       | HOM    | 9    | 139399229 | C           | T              | 0.219 | 33    | 151      | NONSENSE | tgG/tgA  | W1638*  |
| 8372      | TP53    | SNP       | HET    | 17   | 7578478   | G           | C              | 0.511 | 95    | 186      | MISSENSE | cCc/cGc  | P112R   |
| 8399      | ULK4    | SNP       | HOM    | 3    | 41996187  | C           | A              | 0.133 | 4     | 30       | MISSENSE | cGa/cTa  | R22L    |
| 8399      | EGFR    | SNP       | HOM    | 7    | 55233129  | G           | T              | 0.105 | 4     | 38       | NONSENSE | Gga/Tga  | G627*   |
| 8420      | CUL9    | SNP       | HOM    | 6    | 43170869  | G           | T              | 0.121 | 4     | 33       | MISSENSE | aGc/aTc  | S1259I  |
| 8420      | EGFR    | SNP       | HOM    | 7    | 55260487  | C           | A              | 0.111 | 4     | 36       | NONSENSE | tCa/tAa  | S885*   |
| 8420      | PCLO    | SNP       | HOM    | 7    | 82545627  | G           | T              | 0.125 | 4     | 32       | MISSENSE | tCc/tAc  | S3892Y  |
| 8496      | MUC19   | SNP       | HOM    | 12   | 40879080  | C           | T              | 0.216 | 66    | 306      | MISSENSE | gCa/gTa  | A4109V  |
| 8496      | MUC19   | SNP       | HOM    | 12   | 40879082  | A           | T              | 0.216 | 66    | 306      | NONSENSE | Aga/Tga  | R4110*  |
| 26710     | MIA3    | SNP       | HOM    | 1    | 222838725 | C           | T              | 0.185 | 22    | 119      | MISSENSE | Ctc/Ttc  | L1830F  |
| 26710     | MIA3    | SNP       | HOM    | 1    | 222838734 | C           | T              | 0.212 | 21    | 99       | MISSENSE | Cgg/Tgg  | R1833W  |
| 26710     | TTN     | SNP       | HOM    | 2    | 179632555 | G           | T              | 0.121 | 4     | 33       | MISSENSE | aaC/aaA  | N3088K  |
| 26710     | ZAN     | SNP       | HOM    | 7    | 100374121 | C           | T              | 0.207 | 12    | 58       | MISSENSE | gCg/gTg  | A2139V  |
| 26710     | CLUH    | SNP       | HET    | 17   | 2594021   | A           | T              | 0.264 | 42    | 159      | MISSENSE | cTc/cAc  | L1266H  |
| 26710     | TP53    | SNP       | HOM    | 17   | 7577586   | A           | C              | 0.198 | 118   | 595      | MISSENSE | aTc/aGc  | I100S   |
| 27487     | AKR7L   | SNP       | HOM    | 1    | 19600376  | T           | G              | 0.119 | 5     | 42       | MISSENSE | Atg/Ctg  | M65L    |
| 27487     | FLG     | SNP       | HOM    | 1    | 152280857 | T           | C              | 0.107 | 6     | 56       | MISSENSE | Agc/Ggc  | S2169G  |
| 27487     | MUC19   | SNP       | HOM    | 12   | 40879080  | C           | T              | 0.201 | 40    | 199      | MISSENSE | gCa/gTa  | A4109V  |
| 27487     | MUC19   | SNP       | HOM    | 12   | 40879082  | A           | T              | 0.201 | 40    | 199      | NONSENSE | Aga/Tga  | R4110*  |
| 27487     | NBEA    | Deletion  | HET    | 13   | 35516972  | GCCG<br>GGC | G              | 0.662 | 45    | 68       |          | ccgggc/- | PG6-    |
| 27512     | PCDH17  | Deletion  | HOM    | 13   | 58299434  | GA          | G              | 0.169 | 11    | 65       |          |          |         |
| 27554     | PCDHB6  | SNP       | HOM    | 5    | 140532121 | G           | T              | 0.118 | 4     | 34       | MISSENSE | gaG/gaT  | E625D   |
| 27554     | TP53    | Insertion | HOM    | 17   | 7578394   | T           | TGGTG<br>GGGCA | 0.138 | 34    | 247      |          |          |         |
| 27567     | F5      | SNP       | HOM    | 1    | 169515742 | C           | A              | 0.133 | 4     | 30       | MISSENSE | tGt/tTt  | C567F   |
| 27567     | IQCB1   | SNP       | HOM    | 3    | 121500705 | G           | A              | 0.125 | 4     | 32       | MISSENSE | gCg/gTg  | A299V   |
| 27567     | MUC19   | SNP       | HET    | 12   | 40879854  | G           | T              | 0.467 | 28    | 60       | MISSENSE | aGc/aTc  | S4367I  |
| 27581     | F5      | SNP       | HOM    | 1    | 169529927 | C           | A              | 0.105 | 4     | 38       | NONSENSE | Gaa/Taa  | E151*   |
| 27581     | PCDH18  | SNP       | HOM    | 4    | 138451277 | C           | A              | 0.108 | 4     | 37       | MISSENSE | Gtt/Ttt  | V656F   |
| 27581     | MUC19   | SNP       | HOM    | 12   | 40879854  | G           | T              | 1     | 34    | 34       | MISSENSE | aGc/aTc  | S4367I  |
| 27584     | TTN     | SNP       | HET    | 2    | 179430997 | G           | A              | 0.357 | 5     | 14       | MISSENSE | aCg/aTg  | T17556M |
| 27584     | FAM135B | SNP       | HOM    | 8    | 139149456 | G           | T              | 0.105 | 4     | 38       | MISSENSE | Cgt/Agt  | R1317S  |
| 27596     | CSPG4   | SNP       | HOM    | 15   | 75982072  | G           | A              | 0.103 | 6     | 58       | MISSENSE | gCc/gTc  | A445V   |
| 27596     | CSPG4   | SNP       | HOM    | 15   | 75982085  | C           | T              | 0.105 | 6     | 57       | MISSENSE | Gag/Aag  | E441K   |
| 27599     | TP53    | SNP       | HOM    | 17   | 7577081   | T           | C              | 0.138 | 30    | 218      | MISSENSE | gAa/gGa  | E127G   |
| 28463     | TTN     | SNP       | HOM    | 2    | 179463986 | G           | A              | 0.129 | 4     | 31       | MISSENSE | aCg/aTg  | T16277M |
| 28463     | MUC19   | SNP       | HOM    | 12   | 40879080  | C           | T              | 0.153 | 24    | 157      | MISSENSE | gCa/gTa  | A4109V  |
| 28463     | MUC19   | SNP       | HOM    | 12   | 40879082  | A           | T              | 0.152 | 24    | 158      | NONSENSE | Aga/Tga  | R4110*  |
| 28524     | TTN     | SNP       | HOM    | 2    | 179474027 | C           | A              | 0.105 | 4     | 38       | MISSENSE | cGa/cTa  | R14769L |
| 28524     | CSPG4   | SNP       | HOM    | 15   | 75982085  | C           | T              | 0.196 | 10    | 51       | MISSENSE | Gag/Aag  | E441K   |
| 28643     | MUC19   | SNP       | HOM    | 12   | 40879080  | C           | T              | 0.212 | 50    | 236      | MISSENSE | gCa/gTa  | A4109V  |
| 28643     | MUC19   | SNP       | HOM    | 12   | 40879082  | A           | T              | 0.211 | 50    | 237      | NONSENSE | Aga/Tga  | R4110*  |
| 28643     | HUWE1   | SNP       | HOM    | X    | 53610712  | G           | A              | 0.121 | 4     | 33       | MISSENSE | Cat/Tat  | H1776Y  |
| 28773     | PRG4    | SNP       | HOM    | 1    | 186277277 | G           | A              | 0.144 | 115   | 801      | MISSENSE | gGg/gAg  | G675E   |
| 28773     | PCDHB8  | SNP       | HET    | 5    | 140558212 | A           | C              | 0.273 | 12    | 44       | MISSENSE | aaA/aaC  | K199N   |
| 28773     | ZNF750  | SNP       | HOM    | 17   | 80790256  | A           | T              | 0.113 | 59    | 520      | NONSENSE | taT/taA  | Y25*    |
| 28909     | PCDHB2  | SNP       | HOM    | 5    | 140474669 | G           | A              | 0.118 | 4     | 34       | MISSENSE | Ggc/Agc  | G99S    |

|        |          |         |     |     |           |           |   |       |       |     |          |          |         |        |
|--------|----------|---------|-----|-----|-----------|-----------|---|-------|-------|-----|----------|----------|---------|--------|
| 29019  | ULK4     | SNP     | HOM | 3   | 41942307  | G         | T | 0.108 | 4     | 37  | MISSENSE | caC/caA  | H399Q   |        |
| 29019  | FAT1     | SNP     | HET | 4   | 187532585 | T         | C | 0.25  | 11    | 44  | MISSENSE | Ata/Gta  | I3270V  |        |
| 29019  | ADGRV1   | SNP     | HOM | 5   | 90449044  | C         | A | 0.105 | 4     | 38  | MISSENSE | Cct/Act  | P6211T  |        |
| 29019  | CSMD3    | SNP     | HOM | 8   | 113314108 | C         | A | 0.111 | 4     | 36  | MISSENSE | tGc/tTc  | C2616F  |        |
| 29019  | SACS     | SNP     | HOM | 13  | 23912502  | C         | A | 0.125 | 4     | 32  | MISSENSE | gGa/gTa  | G1691V  |        |
| 29019  | TP53     | SNP     | HET | 17  | 7578235   | T         | C | 0.399 | 144   | 361 | MISSENSE | tAt/tGt  | Y166C   |        |
| 29019  | MUC16    | SNP     | HOM | 19  | 9059971   | C         | T | 0.174 | 33    | 190 | MISSENSE | Gtt/Att  | V9159I  |        |
| 29019_ | IN       | DHX9    | SNP | HET | 1         | 182850535 | G | T     | 0.447 | 59  | 132      | MISSENSE | Gta/Tta | V1025L |
| 29019_ | IN       | CAMSAP2 | SNP | HOM | 1         | 200776609 | C | G     | 0.179 | 7   | 39       | MISSENSE | Caa/Gaa | Q169E  |
| 29019_ | IN       | LRP1B   | SNP | HOM | 2         | 141660668 | A | G     | 0.183 | 17  | 93       | MISSENSE | gTc/gCc | V1196A |
| 29019_ | IN       | TTN     | SNP | HET | 2         | 179659753 | C | T     | 0.357 | 96  | 269      | MISSENSE | Ggt/Agt | G381S  |
| 29019_ | IN       | BAP1    | SNP | HET | 3         | 52443861  | G | C     | 0.618 | 55  | 89       | MISSENSE | Cca/Gca | P12A   |
| 29019_ | IN       | PKHD1L1 | SNP | HET | 8         | 110410707 | G | C     | 0.253 | 56  | 221      | MISSENSE | ttG/ttC | L314F  |
| 29019_ | IN       | NOTCH1  | SNP | HET | 9         | 139399276 | C | A     | 0.572 | 115 | 201      | NONSENSE | Gag/Tag | E1623* |
| 29019_ | IN       | TP53    | SNP | HOM | 17        | 7578272   | G | A     | 0.762 | 80  | 105      | MISSENSE | Cat/Tat | H154Y  |
| 29829  | MUC19    | SNP     | HOM | 12  | 40879080  | C         | T | 0.125 | 32    | 256 | MISSENSE | gCa/gTa  | A4109V  |        |
| 29829  | MUC19    | SNP     | HOM | 12  | 40879082  | A         | T | 0.125 | 32    | 256 | NONSENSE | Aga/Tga  | R4110*  |        |
| 29829  | MUC19    | SNP     | HET | 12  | 40879854  | G         | T | 0.531 | 34    | 64  | MISSENSE | aGc/aTc  | S4367I  |        |
| 29845  | TTN      | SNP     | HET | 2   | 179441732 | G         | T | 0.283 | 15    | 53  | NONSENSE | taC/taA  | Y14045* |        |
| 29845  | FAT1     | SNP     | HOM | 4   | 187549851 | C         | G | 0.235 | 8     | 34  | MISSENSE | Gtt/Ctt  | V1464L  |        |
| 29845  | NOTCH1   | SNP     | HET | 9   | 139395021 | C         | G | 0.45  | 54    | 120 | MISSENSE | Gca/Cca  | A1973P  |        |
| 29850  | FLG-AS1  | SNP     | HOM | 1   | 152286367 | C         | A | 0.167 | 6     | 36  | MISSENSE | Cca/Aca  | P145T   |        |
| 29850  | PRG4     | SNP     | HOM | 1   | 186277277 | G         | A | 0.143 | 101   | 708 | MISSENSE | gGg/gAg  | G675E   |        |
| 29850  | PCDHA8   | SNP     | HOM | 5   | 140221012 | C         | T | 0.2   | 17    | 85  | MISSENSE | Ccc/Tcc  | P36S    |        |
| 29850  | CUL9     | SNP     | HOM | 6   | 43184132  | A         | C | 0.108 | 8     | 74  | MISSENSE | cAc/cCc  | H2058P  |        |
| 29850  | MUC16    | SNP     | HOM | 19  | 9018508   | T         | G | 0.127 | 8     | 63  | MISSENSE | Aag/Cag  | K12556Q |        |
| 29855  | PCDHA8   | SNP     | HOM | 5   | 140221071 | G         | T | 0.231 | 15    | 65  | MISSENSE | gaG/gaT  | E55D    |        |
| 29855  | APOBEC3B | SNP     | HOM | 22  | 39381835  | T         | C | 0.138 | 18    | 130 | MISSENSE | Tac/Cac  | Y65H    |        |

Non-synonymous somatic mutations in 26 normal mucosae from early-stage esophageal squamous cell carcinoma (ESCC).

Patients identified using target panel mounted with candidate ESCC driver genes.

Chr, Chromosome; Ref, Reference allele; Alt, mutant allele; MAF, mutant allele frequency; Coverage is filter read depth using molecular barcode.

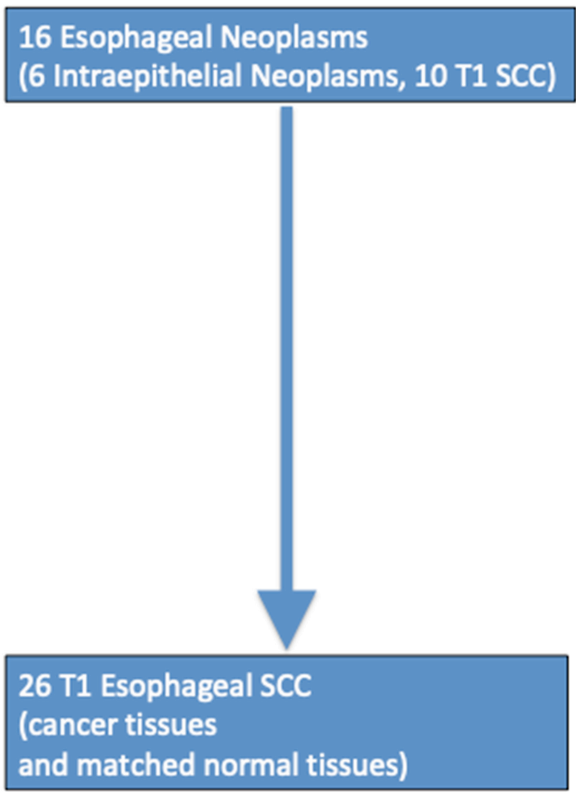

SCC; squamous cell carcinoma

Supplementary Figure 1: Study design.

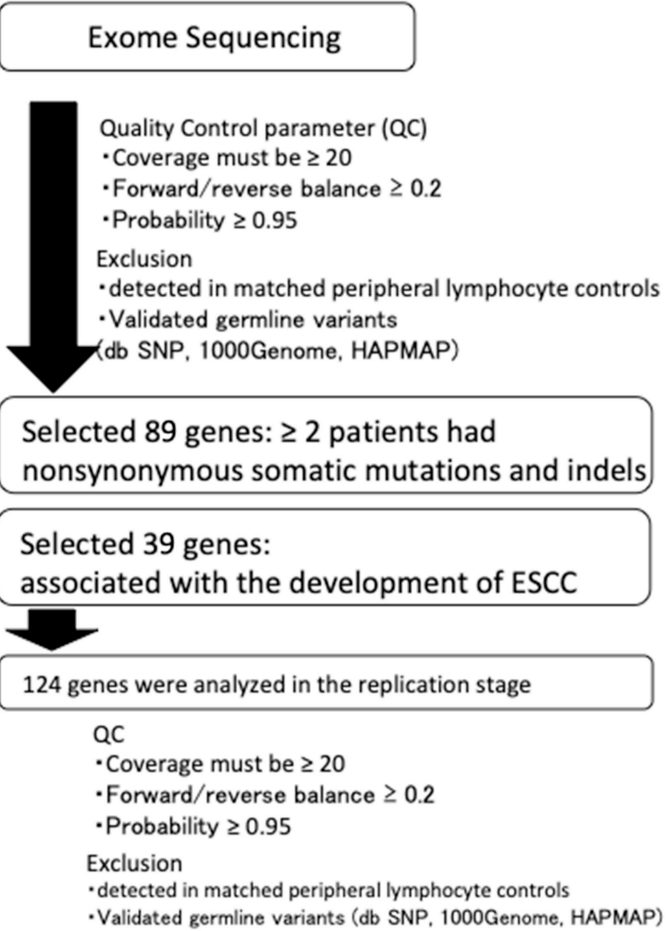

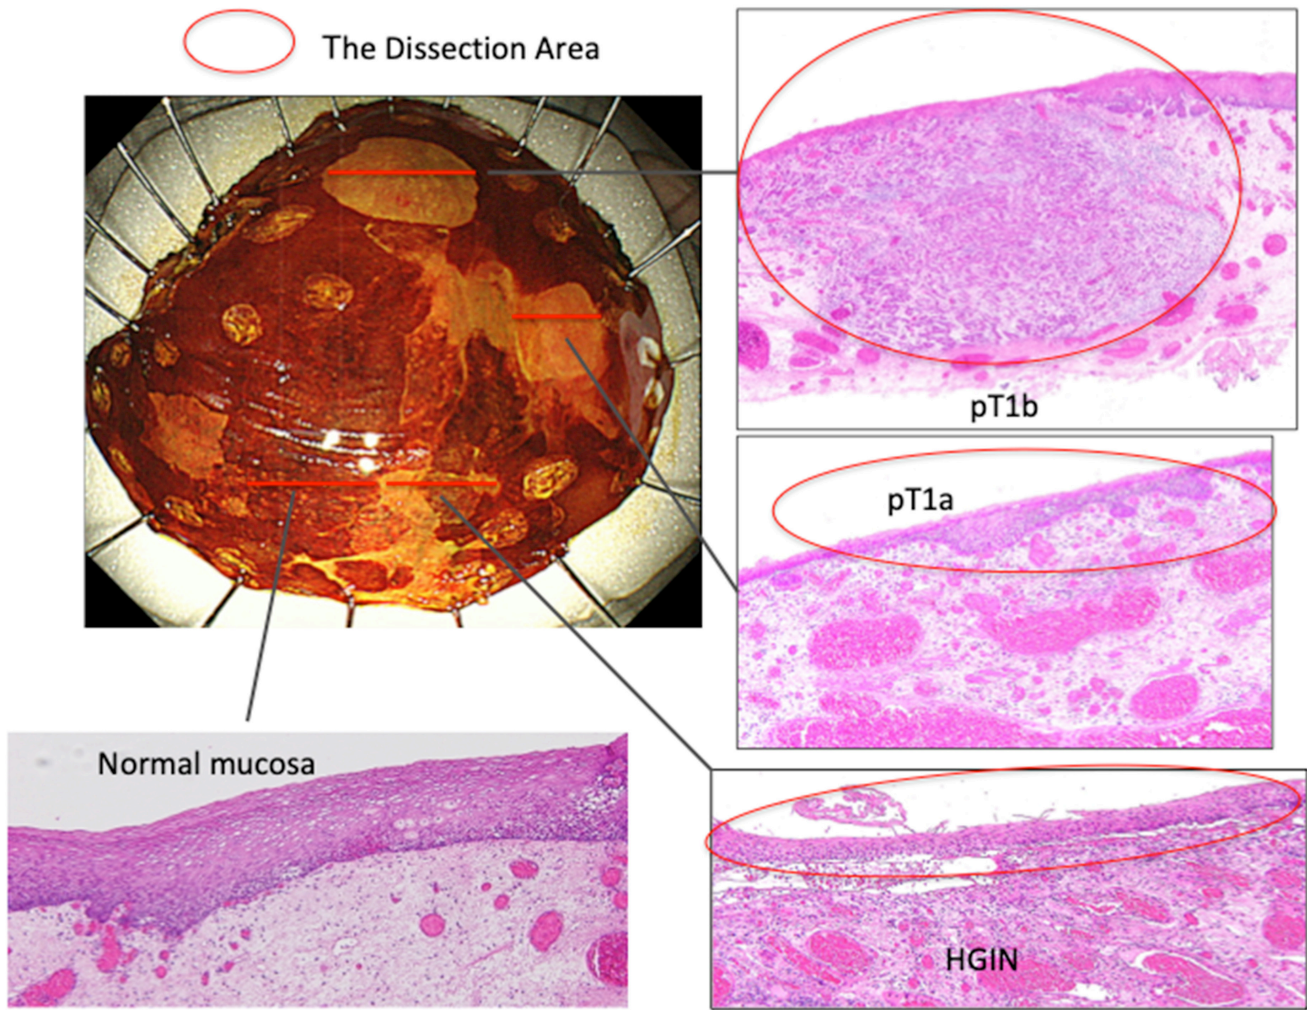

Supplementary Figure 2: Diagram showing the hematoxylin- and eosin-stained sections of morphologically normal epithelial tissue, low-grade dysplasia (LD), high-grade dysplasia (HD), and invasive esophageal squamous cell carcinoma (ESCC) from the same case.



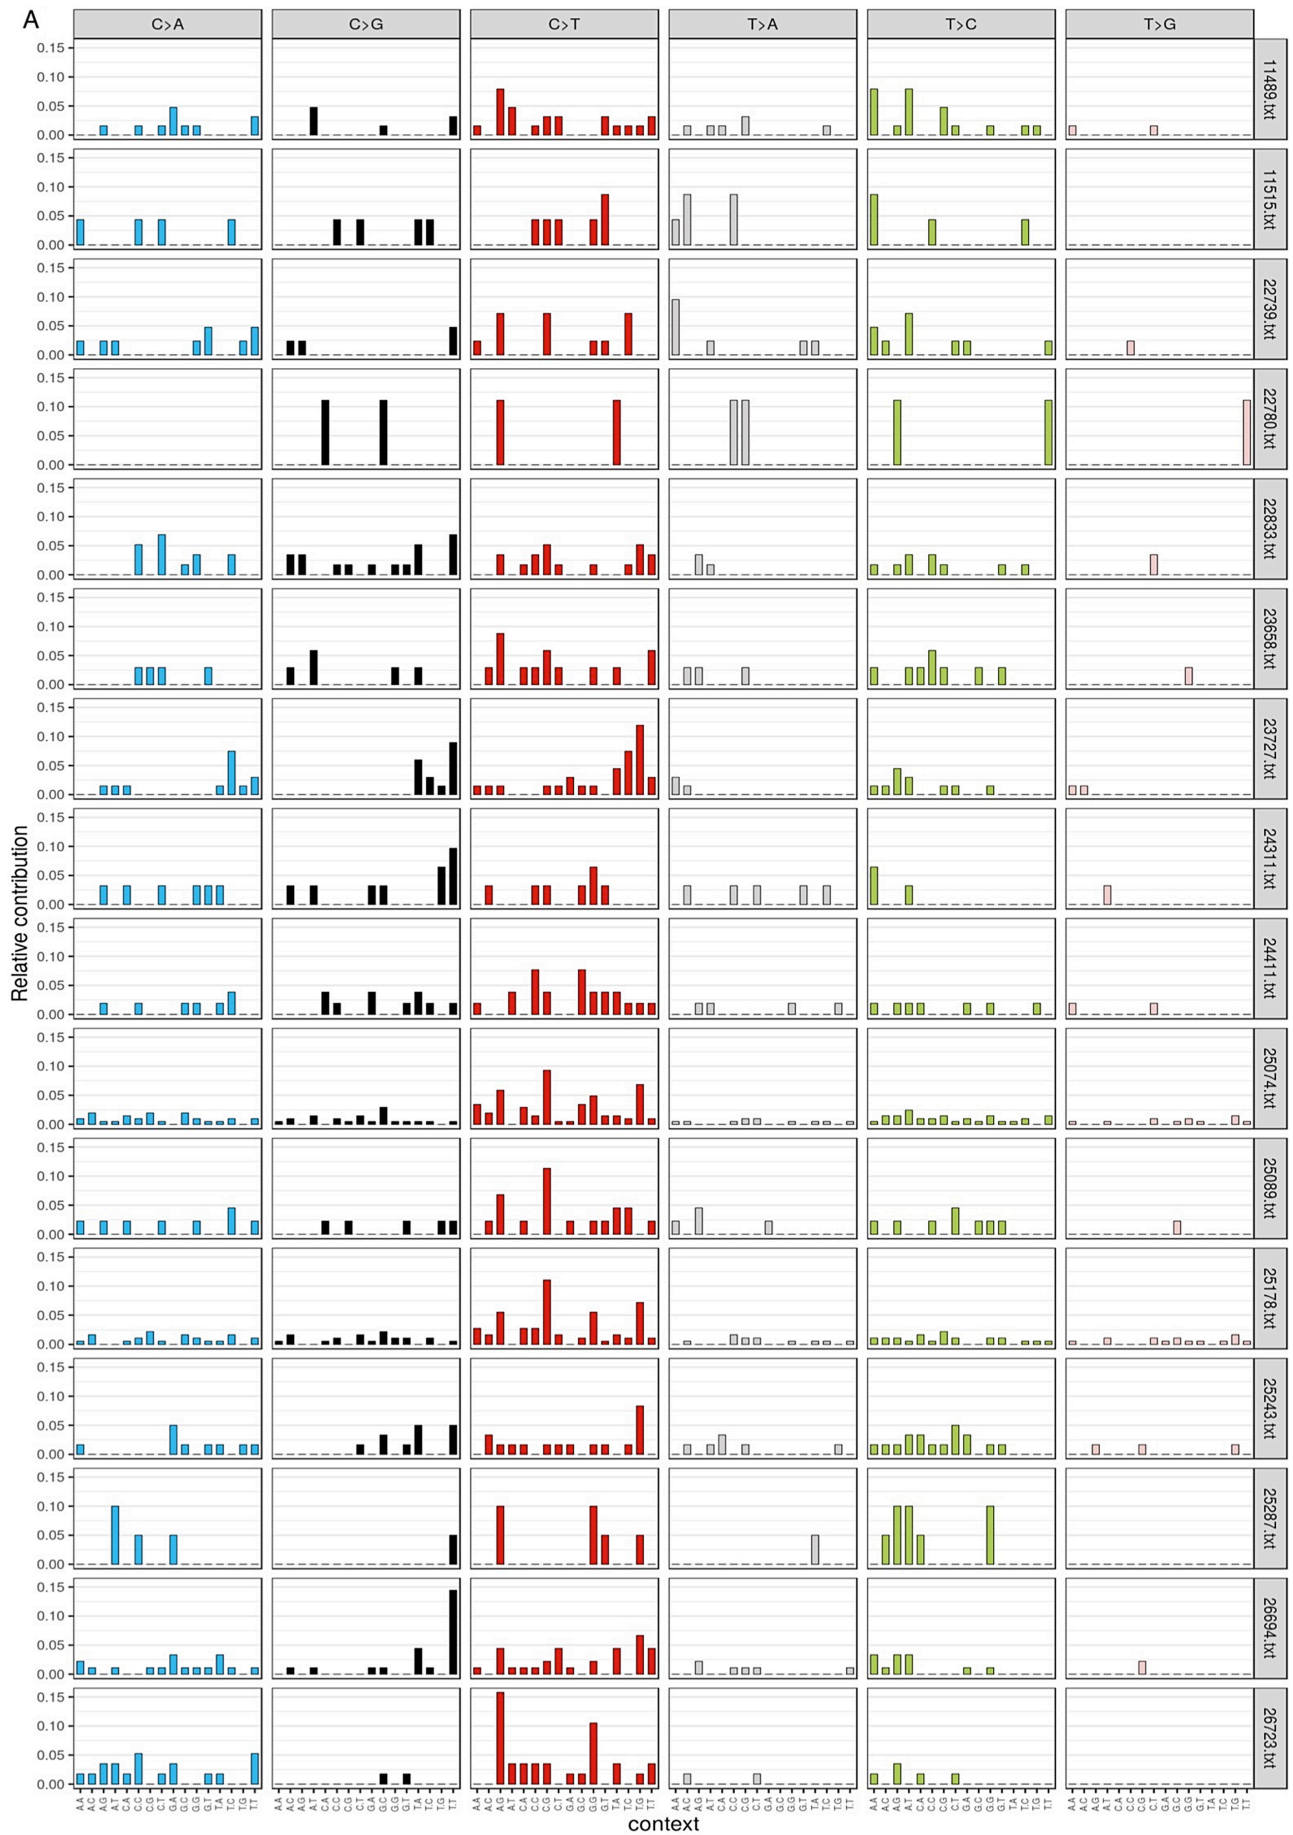



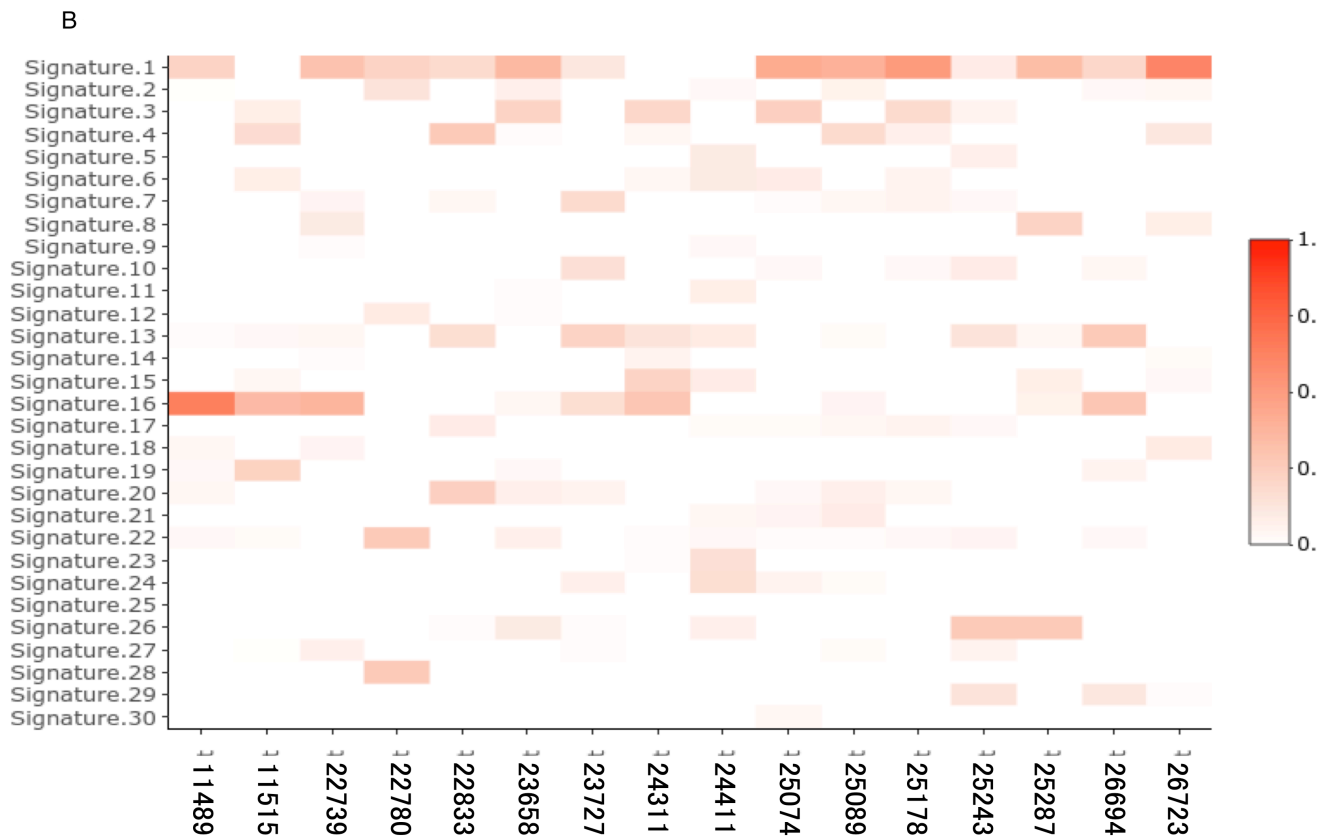

**Supplementary Figure 3: Mutation signatures of ESCC samples used during the screening stage.** (A) Number of trinucleotide substitution patterns in esophageal squamous cell neoplasms. Six possible substitutions from pyrimidine bases were further subdivided into 96 patterns based on the neighboring nucleotides. (B) PCA plot of mutational signatures.

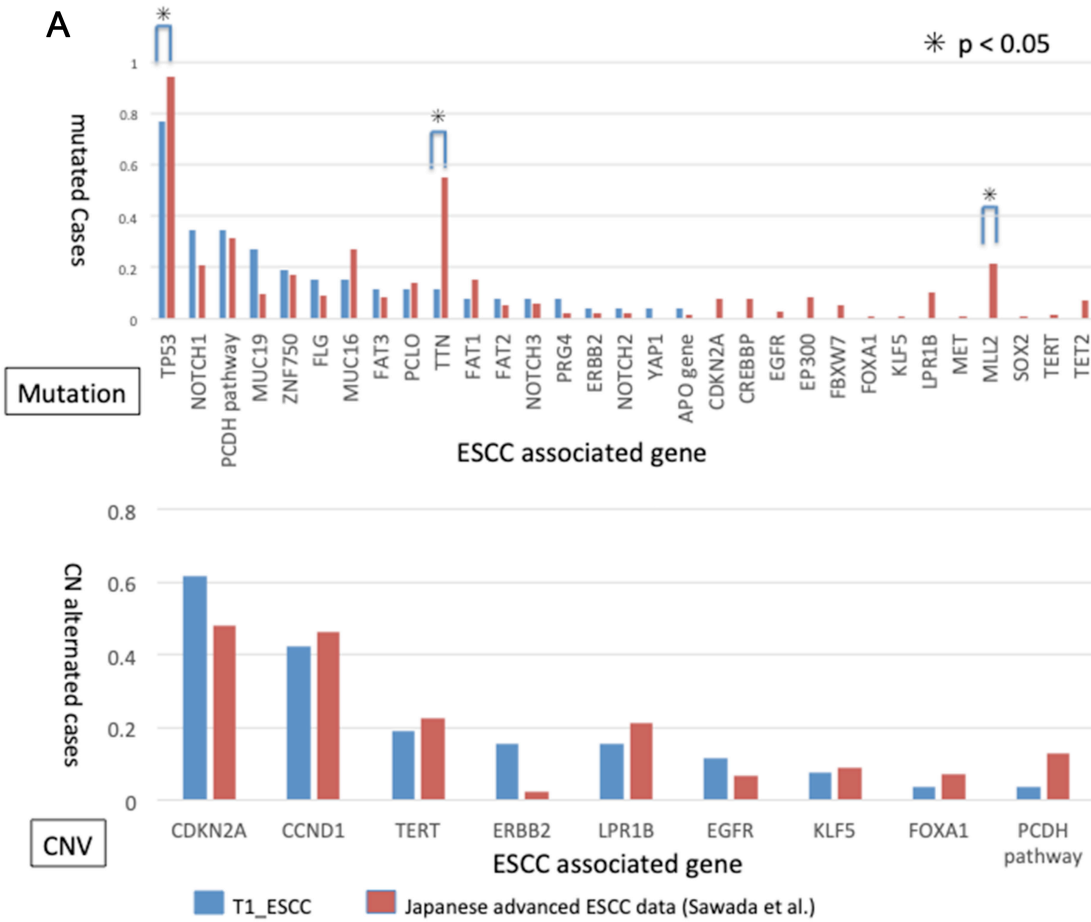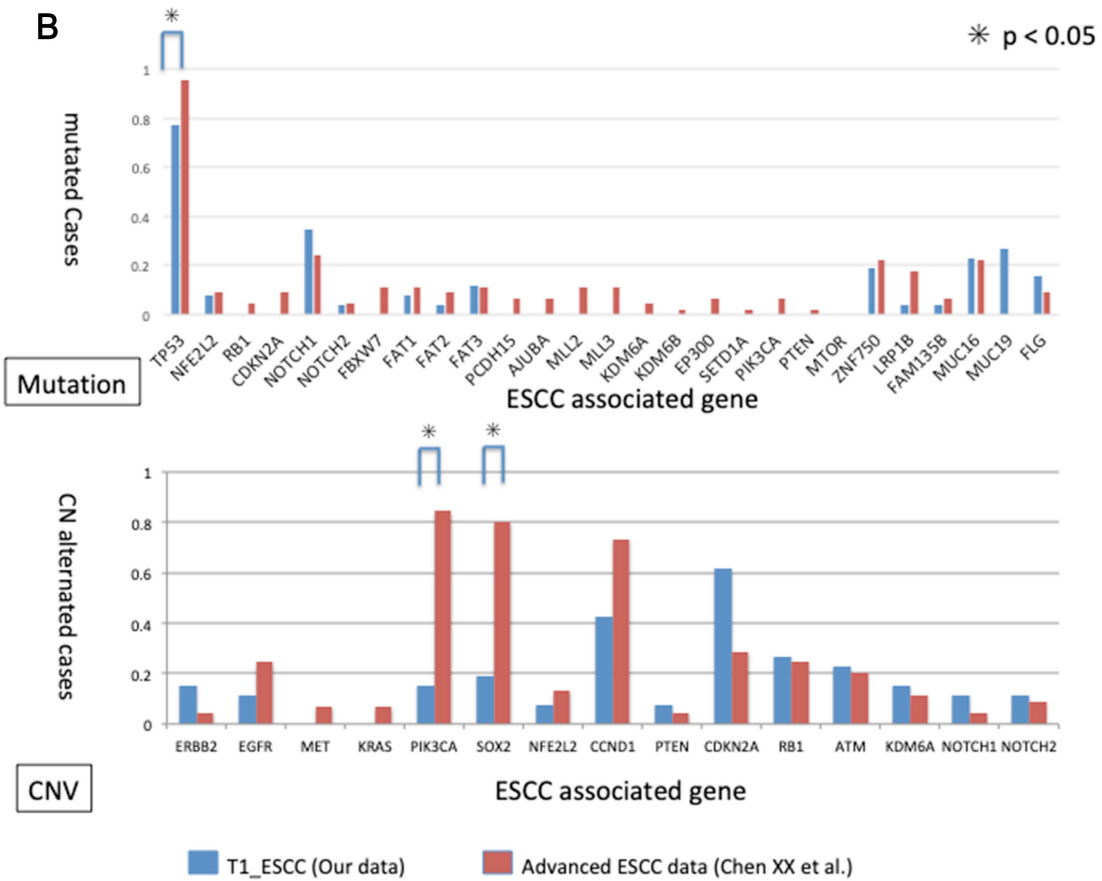

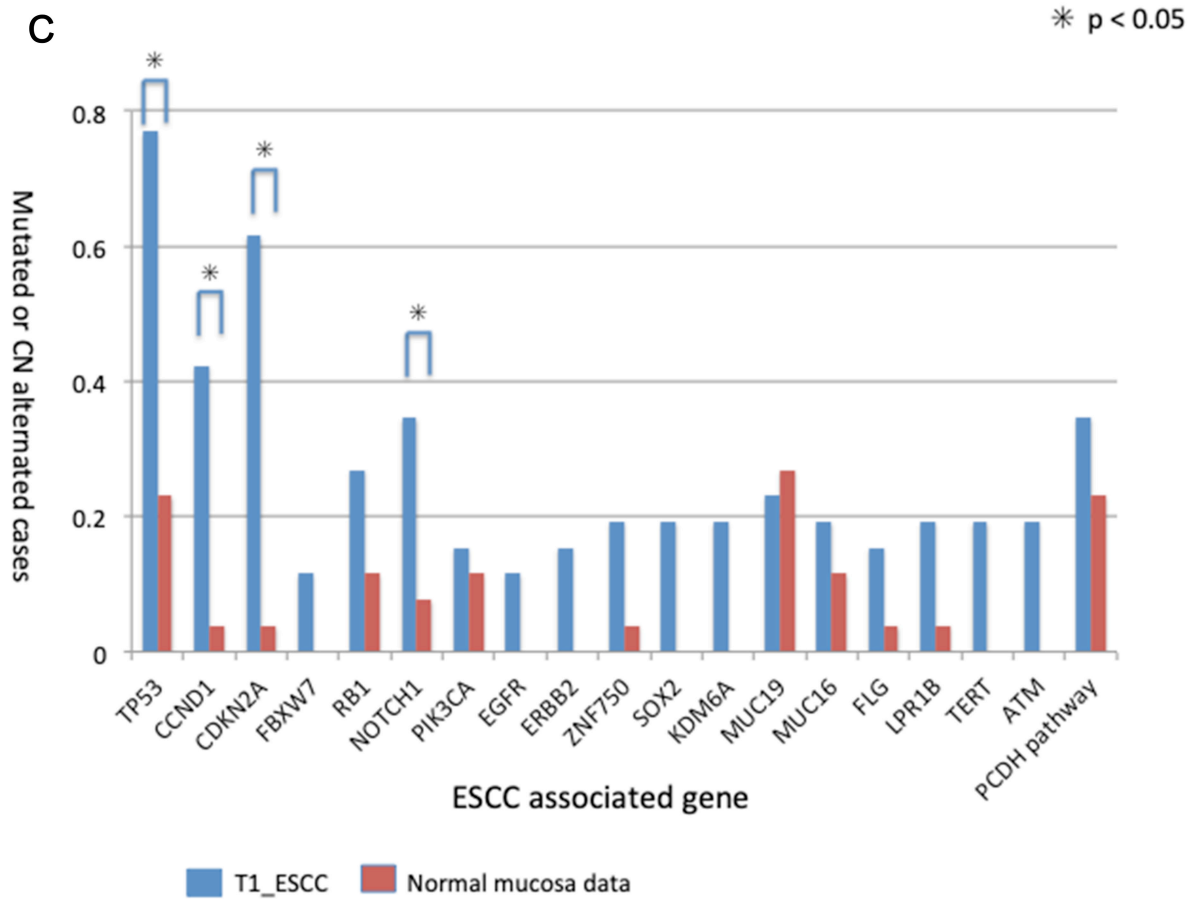

**Supplementary Figure 4:** (A) Comparative analysis of the frequency of non-synonymous somatic mutations and copy-number alterations in early stage and advanced-stage cancer [7] in representative esophageal squamous cell carcinoma (ESCC) driver genes. (B) Comparative analysis of the frequency of non-synonymous somatic mutations and copy-number alterations in early stage ESCC and advanced-stage cancer [16] in representative esophageal squamous cell carcinoma (ESCC) driver genes. (C) Comparative analysis of the frequency of non-synonymous somatic mutations between early-stage esophageal squamous cell carcinoma (ESCC) and non-cancerous tissue in each representative gene. The early stage ESCC and non-cancerous data from 26 ESCC patients with mutations in each representative ESCC driver gene were collected only during the replication stage.

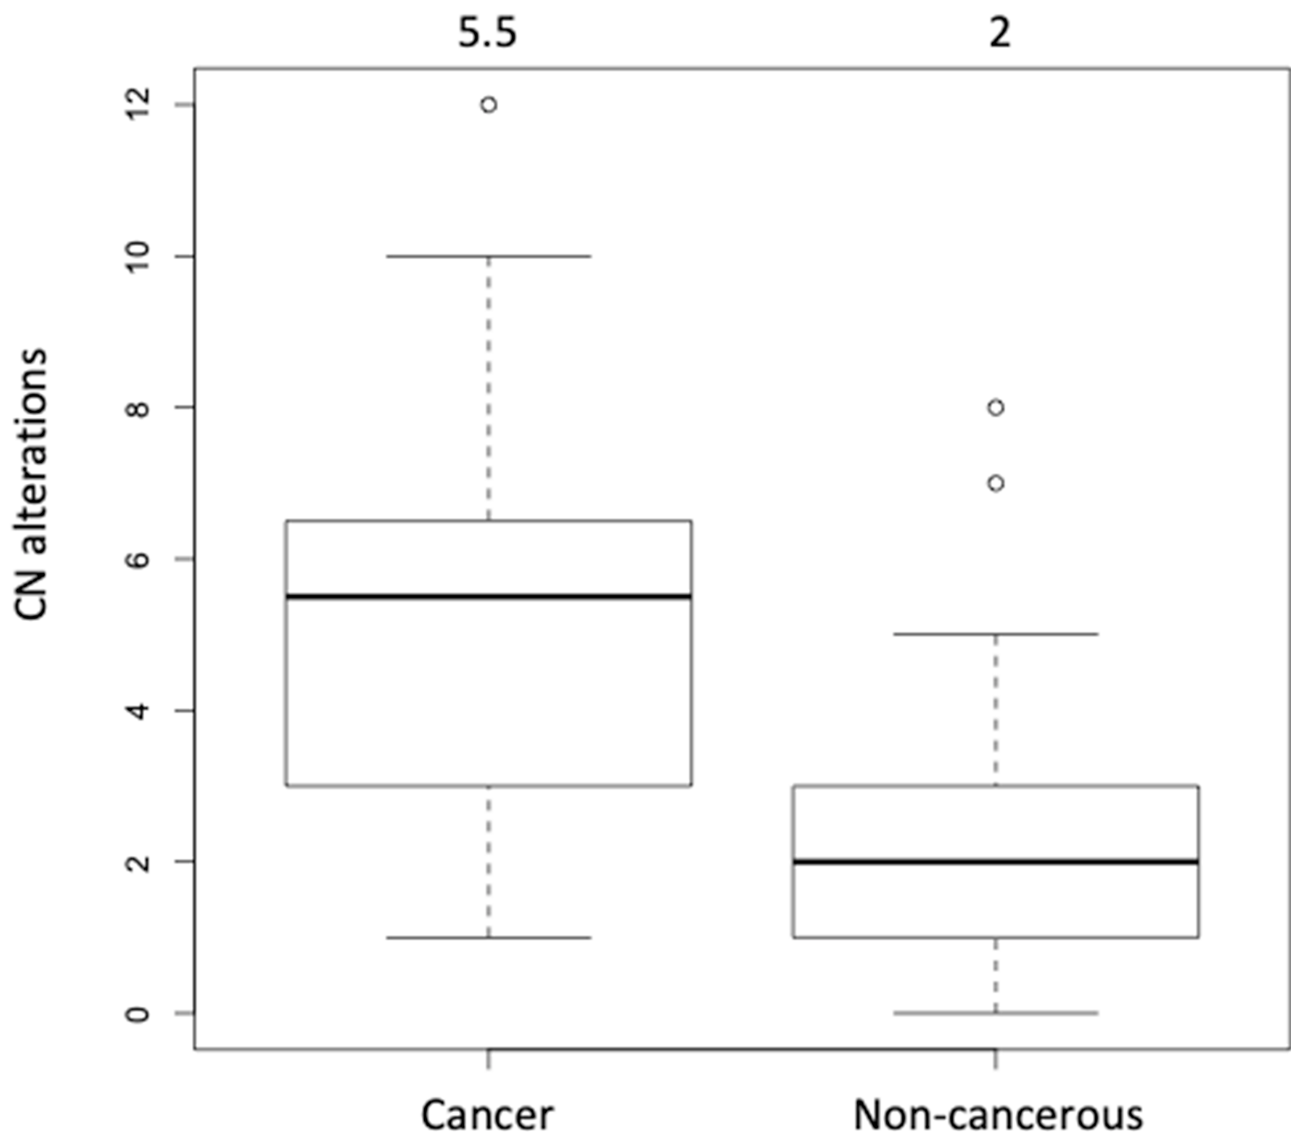

Supplementary Figure 5: Comparative analysis of copy-number alterations in early-stage esophageal squamous cell carcinoma tissues and matched non-cancerous tissues in 26 replication-stage patients.
